# Supplementary material for: Inhibition of Oncogenic Transcription Factor REL by the Natural Product Derivative Calafianin Monomer 101 Induces Proliferation Arrest and Apoptosis in Human B-Lymphoma Cell Lines
Source: MDPI journal article supplement (doi:10.3390/molecules20057474), 2015-04-23
Supplement: s1 [file s1]

## Supplemental Information

The supplemental information contains three Supplemental Figures and Figure Legends, and one chemical synthesis scheme.

- **Figure S1.** CM101 selectively crosslinks p65 and REL to high molecular weight forms through cysteine residues.
- **Figure S2.** CM101 inhibition of cell proliferation in a panel of B-lymphoma cell lines and in K-Ras-transformed mouse 3T3 cells.
- **Scheme S1.** Spiroisoxazoline (CM101) synthesis.
- **Figure S3.** Proposed mechanism of covalent inhibition and cysteine modification by CM101.

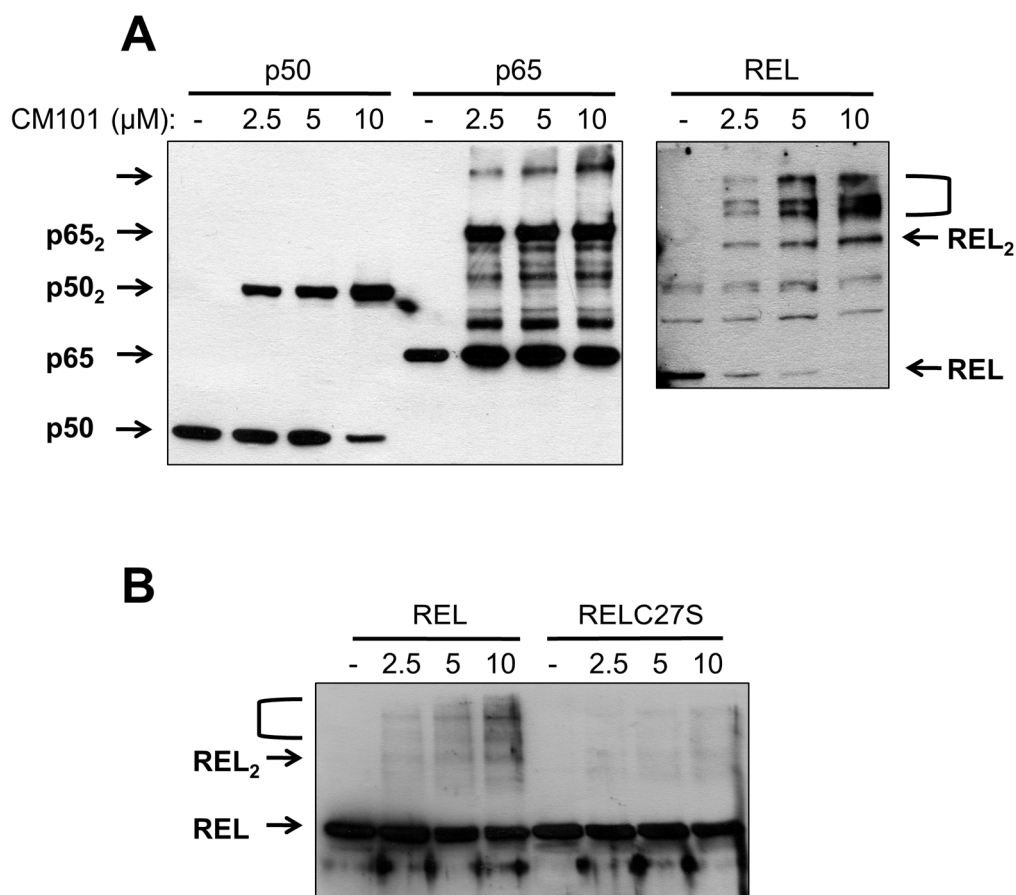

**Figure S1.** CM101 selectively crosslinks p65 and REL to high molecular weight forms through cysteine residues. **(A)** A293 cells were transfected with expression vectors encoding FLAG-tagged human p50, p65 and REL. Transfected cells were treated with the indicated concentrations of CM101 for 2 h, extracts were made, and anti-FLAG Western blotting was performed. The monomer forms of the proteins are indicated by their names. The likely dimers are indicated by p50<sub>2</sub>, p65<sub>2</sub> and REL<sub>2</sub>. The unlabeled left arrow (for p65) and right bracket (for REL) designate the higher molecular weight forms of these proteins. **(B)** A293 cells transfected with expression vectors encoding REL or RELC27S were treated with CM101 and analyzed by Western blotting for FLAG as in (A).

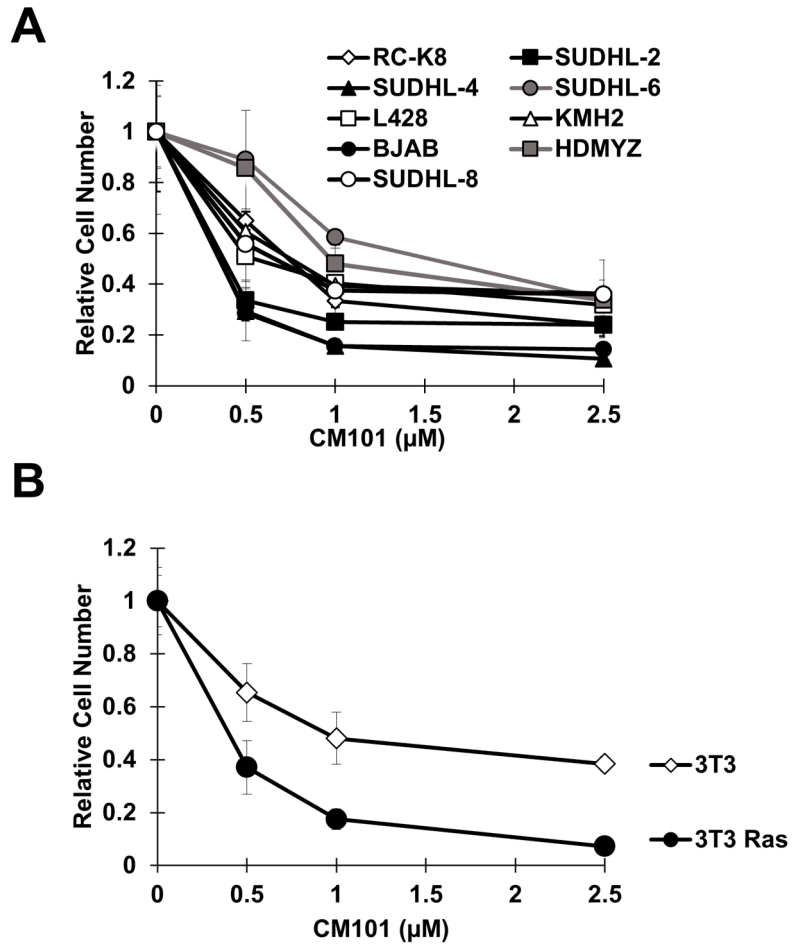

**Figure S2.** CM101 inhibition of cell proliferation in a panel of B-lymphoma cell lines and in K-Ras-transformed mouse 3T3 cells. **(A)** The indicated B-lymphoma cell lines were seeded in triplicate at a cell number of  $10^5$ . Approximately 18 h later, cells were treated with increasing concentrations of CM101 and cells were counted 72 h later. Cell numbers are relative to methanol-treated control cells and plotted. **(B)** Wild-type 3T3 and Ras-transformed 3T3 cells were seeded, treated with CM101, and counted 72 h later as in (A).

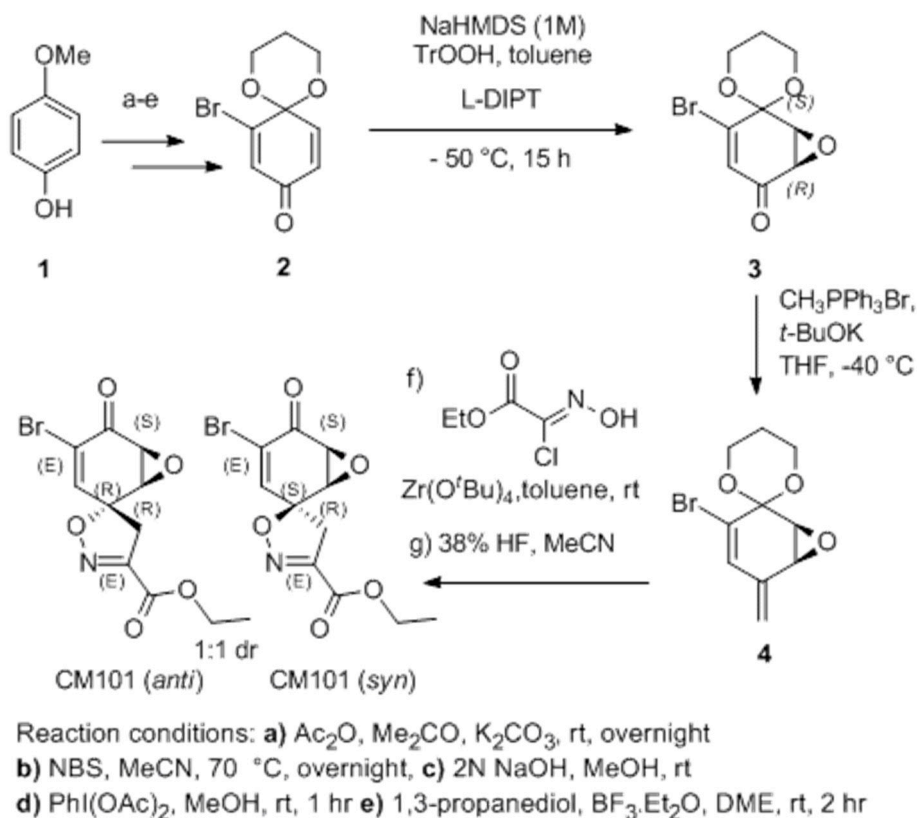

**Scheme S1.** Spiroisoxazoline (CM101) synthesis (as previously reported in [17]).

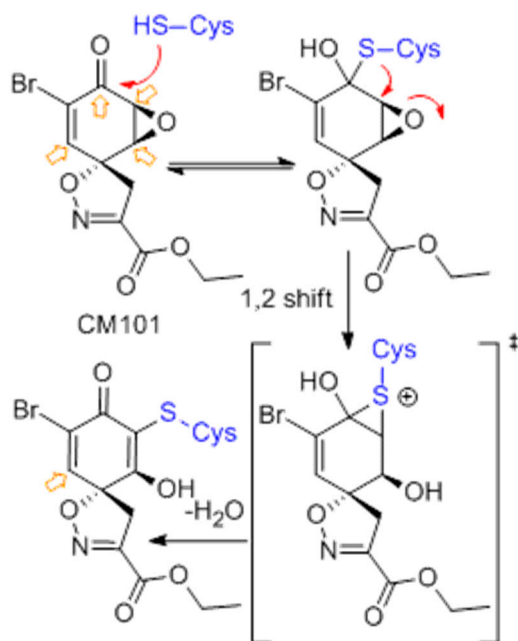

**Figure S3.** Proposed mechanism of covalent inhibition and cysteine modification by CM101. Modification of cysteine by CM101 in NF- $\kappa$ B target proteins likely includes initial attack of thiol to the carbonyl carbon followed by epoxide ring opening *via* intramolecular 1,2 hydride shift to provide a dehydrated  $\alpha$ -addition product.
